# Supplementary material
Source: publisher figshare collection journal article supplement (https://acs.figshare.com/ndownloader/files/22131288)
Supplement: Supplementary file 1 [file 22131288]

## Sheet: Supporting Information
Table S5. The rules for FLuc inhibitors and noninhibitors
Rule
$h_logS$ <= -3.2594870499999997 AND $MACCS(150)$ <= 2.5 AND $MACCS(136)$ <= 0.5 AND $MACCS(100)$ <= 0.5 => 0
$h_logS$ > -3.2594870499999997 AND $MACCS(150)$ <= 2.5 AND $MACCS(136)$ <= 0.5 AND $MACCS(100)$ <= 0.5 => 1
$MACCS(119)$ <= 0.5 AND $MACCS(150)$ > 2.5 AND $MACCS(136)$ <= 0.5 AND $MACCS(100)$ <= 0.5 => 1
$MACCS(119)$ > 0.5 AND $MACCS(150)$ > 2.5 AND $MACCS(136)$ <= 0.5 AND $MACCS(100)$ <= 0.5 => 0
$MACCS(160)$ <= 1.5 AND $MACCS(112)$ <= 0.5 AND $MACCS(111)$ <= 0.5 AND $MACCS(136)$ > 0.5 AND $MACCS(100)$ <= 0.5 => 0
$MACCS(160)$ > 1.5 AND $MACCS(112)$ <= 0.5 AND $MACCS(111)$ <= 0.5 AND $MACCS(136)$ > 0.5 AND $MACCS(100)$ <= 0.5 => 1
$MACCS(112)$ > 0.5 AND $MACCS(111)$ <= 0.5 AND $MACCS(136)$ > 0.5 AND $MACCS(100)$ <= 0.5 => 1
$MACCS(111)$ > 0.5 AND $MACCS(136)$ > 0.5 AND $MACCS(100)$ <= 0.5 => 1
$bit_232$ <= 23.5 AND $MACCS(-90)$ <= 0.5 AND $MACCS(150)$ <= 2.5 AND $bit_342$ <= 1.0 AND $bit_53$ <= 0.5 AND $MACCS(136)$ <= 0.5 AND $MACCS(100)$ > 0.5 => 0
$bit_232$ > 23.5 AND $MACCS(-90)$ <= 0.5 AND $MACCS(150)$ <= 2.5 AND $bit_342$ <= 1.0 AND $bit_53$ <= 0.5 AND $MACCS(136)$ <= 0.5 AND $MACCS(100)$ > 0.5 => 1
$MACCS(-90)$ > 0.5 AND $MACCS(150)$ <= 2.5 AND $bit_342$ <= 1.0 AND $bit_53$ <= 0.5 AND $MACCS(136)$ <= 0.5 AND $MACCS(100)$ > 0.5 => 1
$MACCS(150)$ > 2.5 AND $bit_342$ <= 1.0 AND $bit_53$ <= 0.5 AND $MACCS(136)$ <= 0.5 AND $MACCS(100)$ > 0.5 => 1
$bit_232$ <= 26.5 AND $bit_342$ > 1.0 AND $bit_53$ <= 0.5 AND $MACCS(136)$ <= 0.5 AND $MACCS(100)$ > 0.5 => 0
$bit_232$ > 26.5 AND $bit_342$ > 1.0 AND $bit_53$ <= 0.5 AND $MACCS(136)$ <= 0.5 AND $MACCS(100)$ > 0.5 => 1
$bit_53$ > 0.5 AND $MACCS(136)$ <= 0.5 AND $MACCS(100)$ > 0.5 => 1
$MACCS(136)$ > 0.5 AND $MACCS(100)$ > 0.5 => 1
Explanatory notes:
MACCS -90: het. 3 bonds from a CH2
MACCS 100: N attached to CH2
MACCS 111: N 2bonds from a CH3
MACCS 112: atoms with coordination number >= 4
MACCS 119: N in double bonds
MACCS 136: bit: is there more than 1 O=
MACCS 150: X separated by (!r)-r-(!r)
MACCS 160: CH3 groups
bit_53 : Tertuary aliphatic amines
bit_232：Nonmentals
bit_342: Aromatic five-membered heterocycles with two heteroatoms
